# Supplementary material for: Rhythmic modulation of prediction errors: A top-down gating role for the beta-range in speech processing
Source: PLoS Comput Biol. 2023 Nov 7;19(11):e1011595. doi: 10.1371/journal.pcbi.1011595 (PMC10655987; doi:10.1371/journal.pcbi.1011595)
Supplement: S1 Table — (XLSX) [file pcbi.1011595.s010.xlsx]

## Sheet: Sheet1
S1 Table: Precoss vs. Precoss-β-identity
frequency	signed rank	z-statistic	p-value
2 Hz	10072	-2.2038	0.0275
5 Hz	7527	-4.8963	9.7634e-07
10 Hz	6951	-5.4262	5.7553e-08
20 Hz	6020	-6.4907	8.5422e-11
30 Hz	6778.5	-5.61	2.0233e-08
40 Hz	6018	-6.4201	1.3619e-10
50 Hz	6757	-5.711	1.1231e-08
60 Hz	6176	-6.3257	2.5211e-10
